# Supplementary material for: Behavioral Effect of Terahertz Waves in C57BL/6 Mice
Source: MDPI journal article supplement (doi:10.3390/bios12020079), 2022-01-28
Supplement: s1 [file s1]

Supplementary

# Behavioral Effect of Terahertz Waves in C57BL/6 Mice

Miao Qi <sup>1,2</sup>, Rong Liu <sup>1,2</sup>, Bing Li <sup>1,2</sup>, Shuai Wang <sup>1,2</sup>, Runze Fan <sup>1</sup>, Xinyi Zhao <sup>1,2</sup> and Dehui Xu <sup>1\*</sup>

- <sup>1</sup> State Key Laboratory of Electrical Insulation and Power Equipment, Centre for Plasma Biomedicine, Xi'an Jiaotong University, Xi'an, Shaanxi, 710049, China; qimiao@stu.xjtu.edu.cn (M.Q.); liu-rong0812@stu.xjtu.edu.cn (R.L.); lb905533242@stu.xjtu.edu.cn (B.L.); shuaiwang3059@stu.xjtu.edu.cn (S.W.); fanrunze@stu.xjtu.edu.cn (R.F.); zhaoxinyi@stu.xjtu.edu.cn (X.Z.)
- <sup>2</sup> The school of Life Science and Technology, Xi'an Jiaotong University, Xi'an, Shaanxi, 710049, China.
- \* Correspondence: dehuixu@mail.xjtu.edu.cn

**Citation:** Qi, M.; Liu, R.; Li, B.; Wang, S.; Fan, R.; Zhao, X.; Xu, D. Behavioral Effect of Terahertz Waves in C57BL/6 Mice. *Biosensors* **2022**, *12*, 79. <https://doi.org/10.3390/bios12020079>

Received: 05 January 2022

Accepted: 26 January 2022

Published: 28 January 2022

**Publisher's Note:** MDPI stays neutral with regard to jurisdictional claims in published maps and institutional affiliations.

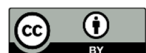

**Copyright:** © 2022 by the authors. Submitted for possible open access publication under the terms and conditions of the Creative Commons Attribution (CC BY) license (<https://creativecommons.org/licenses/by/4.0/>).

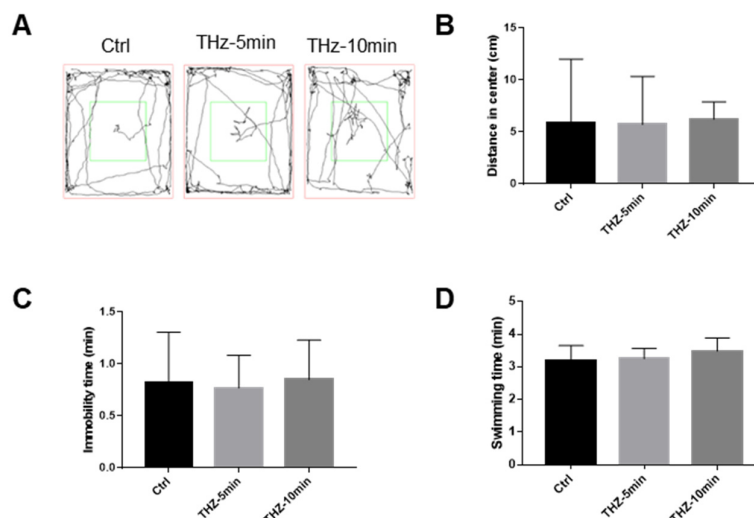

**Figure S1.** Analysis of the open field test and forced swim test after THz treatment. (A) moved pathways (B) and distance in center in the open field test; (C) immobility time (D) and swimming time in forced swim test.
